# Supplementary material
Source: PubMed Central journal article supplement (PMC7841579)
Supplement: jamasurg-e206363-s001.pdf [file jamasurg-e206363-s001.pdf]

## Supplementary Online Content

Kusamura S, Barretta F, Yonemura Y, et al; Peritoneal Surface Oncology Group International (PSOGI) and the French National Registry of Rare Peritoneal Surface Malignancies (RENAPE). The role of hyperthermic intraperitoneal chemotherapy in pseudomyxoma peritonei after cytoreductive surgery. *JAMA Surg*. Published online January 27, 2021. doi:10.1001/jamasurg.2020.6363

**eFigure 1.** Flowchart of Patients Selected for the Analysis (Unweighted Numbers)

**eFigure 2.** Kaplan-Meier Overall Survival Curves According to Treatment

**eTable 1.** HIPEC Schedules

**eTable 2.** Distribution of Prognostic Factors Between the Study Groups Before and After IPTW Weighting Adjustment in CC-0/1 Cases

**eTable 3.** Distribution of Prognostic Factors Between the Study Groups Before and After IPTW Weighting Adjustment in CC-2/3 Cases

**eTable 4.** Distribution of Prognostic Factors Between the Study Groups Before and After IPTW Weighting Adjustment in Low-Grade Disease

**eTable 5.** Distribution of Prognostic Factors Between the Study Groups Before and After IPTW Weighting Adjustment in High-Grade Disease

**eTable 6.** Distribution of Prognostic Factors Between the Study Groups Before and After IPTW Weighting Adjustment for HIPEC With Cisplatin Plus Mitomycin

**eTable 7.** Distribution of Prognostic Factors Between the Study Groups Before and After IPTW Weighting Adjustment for HIPEC With Mitomycin

**eTable 8.** Distribution of Prognostic Factors Between the Study Groups Before and After IPTW Weighting Adjustment for HIPEC With Oxaliplatin Plus Fluorouracil/Leucovorin

**eTable 9.** Distribution of Prognostic Factors Between the Study Groups Before and After IPTW Weighting Adjustment for HIPEC With Other Oxaliplatin-Based Combinations

**eTable 10.** Surgical Outcomes of Patients With PMP Undergoing CRS-HIPEC (n = 1548) and CRS Alone (n = 376)

**eTable 11.** Unweighted Comparison of the Distribution of the Prognostic Factors and Outcomes Between Included and Excluded Cases

**eTable 12.** Unweighted Distribution of Prognostic Factors Between the Study Groups in the Cases That Were Excluded Due to Incomplete Data

This supplementary material has been provided by the authors to give readers additional information about their work.

**eFigure 1. Flowchart of Patients Selected for the Analysis (Unweighted Numbers)**

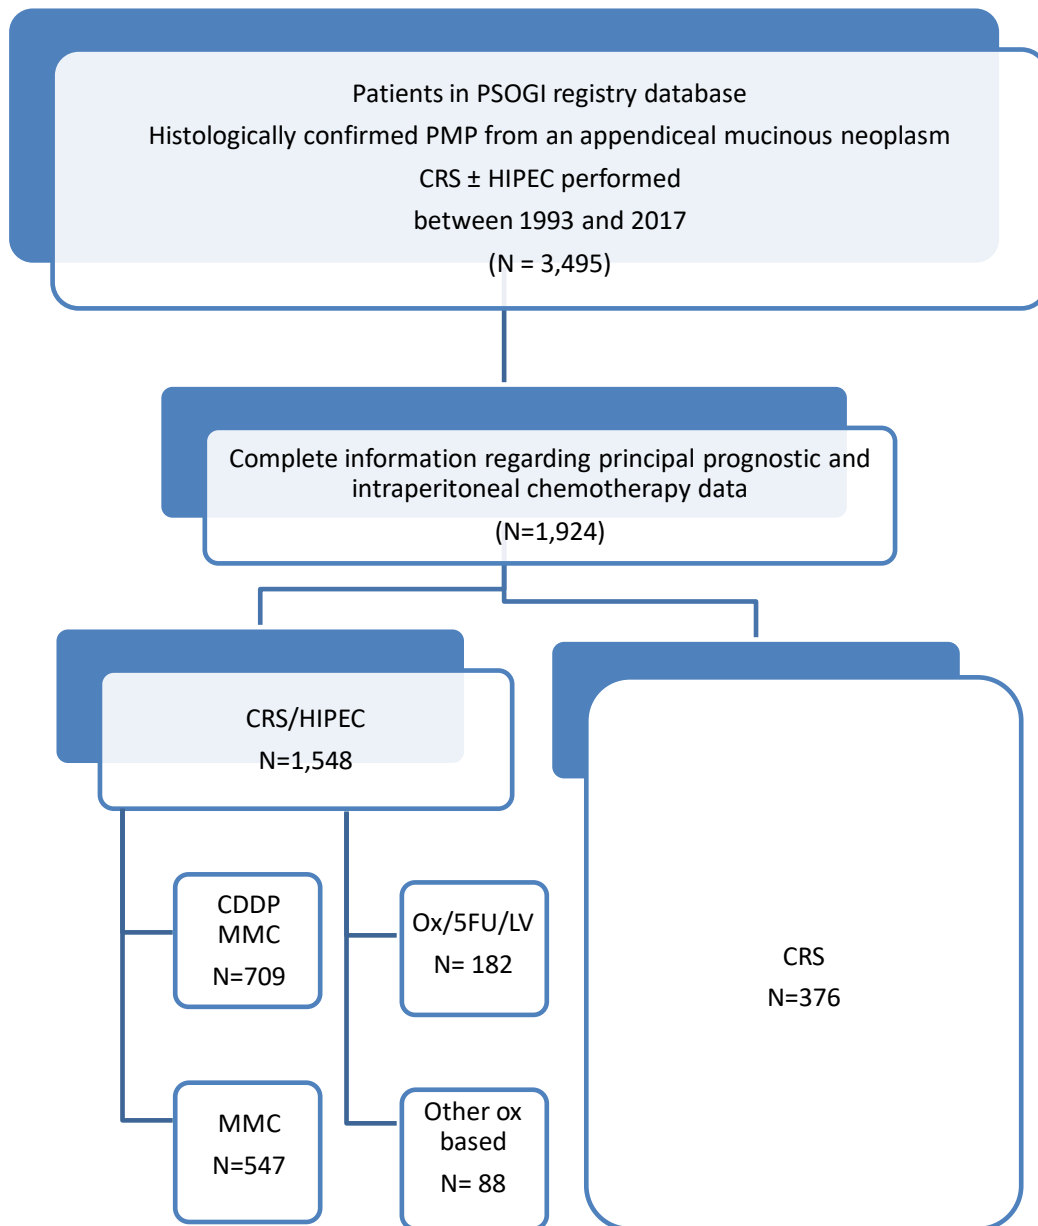

**eFigure 2. Kaplan-Meier Overall Survival Curves According to Treatment**

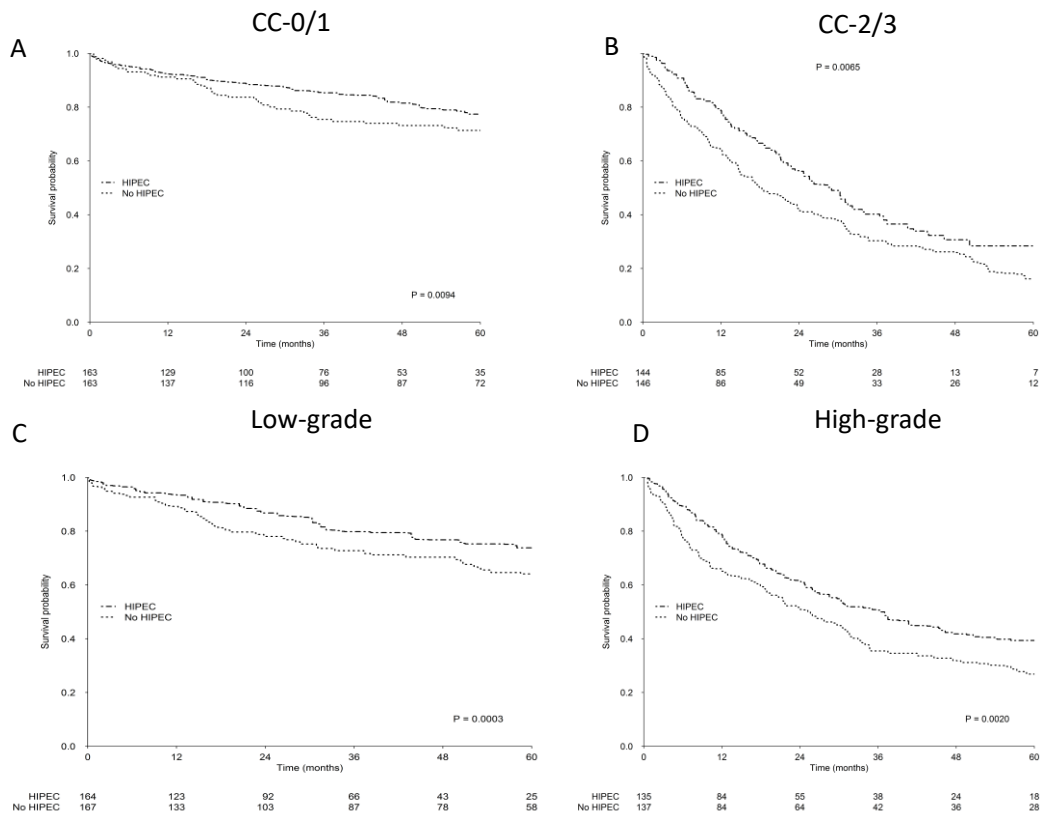

**Includes CRS+HIPEC vs CRS alone in CC-0/1 patients (A), CC-2/3 patients (B), low-grade patients (C), and high-grade patients (D).**

**eTable 1. HIPEC Schedules**

| Intraperitoneal drug schedules | Drug 1                                         | Drug 2                      | Drug 3 | Perfusate                            | Duration | Temperature (°C) | Modality of perfusion |
|--------------------------------|------------------------------------------------|-----------------------------|--------|--------------------------------------|----------|------------------|-----------------------|
| MMC 1                          | 35 mg/M <sup>2</sup>                           | -                           | -      | PDS                                  | 90 min   | 42.0-43.0        | open                  |
| MMC 2                          | 40 mg fixed-dose                               | -                           | -      | NS<br>3 L fixed volume               | 120 min  | 42.0             | closed                |
| CDDP MMC                       | Cisplatin 25 mg/M <sup>2</sup> /L of perfusate | MMC 3.3 mg/L/M <sup>2</sup> | -      | NS+ colloid<br>2.5 L /m <sup>2</sup> | 60 min   | 42.5             | closed                |
| Oxaliplatin + 5-FU/LV          | Oxaliplatin 460 mg/M <sup>2</sup>              | 5-FU                        | LV     | D5W<br>2.0 L/m <sup>2</sup>          | 30 min   | 43.0             | open                  |
| Oxaliplatin + 5-FU/LV          | Oxaliplatin 360 mg/M <sup>2</sup>              | 5-FU                        | LV     | D5W<br>4-6L                          | 30 min   | 42.0             | closed                |
| Other oxaliplatin              | 200 mg/M <sup>2</sup>                          | -                           | -      | NS<br>3 L fixed volume               | 120 min  | 40.0             | closed                |

MMC: mitomycin-C; CDDP: cisplatin; LV: leucovorin; POD:postoperative day; PDS: peritoneal dialysis solution; NS: normal saline; D5W, dextrose 5%

**eTable 2. Distribution of Prognostic Factors Between the Study Groups Before and After IPTW Weighting Adjustment in CC-0/1 Cases**

|                  |   | Unweighted comparison |               |        |
|------------------|---|-----------------------|---------------|--------|
|                  |   | CRS alone             | CRS/HIPEC     | SMD    |
| n                |   | 164                   | 1352          |        |
| Age (mean (SD))  |   | 55.36 (14.43)         | 53.45 (12.11) | 0.144  |
| Priorche = 1 (%) |   | 69 (42.1)             | 423 (31.3)    | 0.225  |
| LN = 1 (%)       |   | 7 ( 4.3)              | 94 ( 7.0)     | 0.117  |
| PCI (mean (SD))  |   | 14.45 (11.48)         | 17.94 (10.67) | 0.315  |
| PSS (%)          |   |                       |               | 0.346  |
| 0                |   | 52 (31.7)             | 287 (21.2)    |        |
| 1                |   | 48 (29.3)             | 413 (30.5)    |        |
| 2                |   | 51 (31.1)             | 413 (30.5)    |        |
| 3                |   | 13 ( 7.9)             | 239 (17.7)    |        |
| CC (%)           | 1 | 57 (34.8)             | 473 (35.0)    | 0.005  |
| Epic (%)         | 1 | 37 (22.6)             | 225 (16.6)    | 0.150  |
| Histol (%)       | 1 | 59 (36.0)             | 388 (28.7)    | 0.156  |
|                  |   | Weighted comparison   |               |        |
|                  |   | CRS alone             | CRS/HIPEC     | SMD    |
| n                |   | 163.61                | 163.71        |        |
| Age (mean (SD))  |   | 55.31 (14.41)         | 55.38 (13.99) | 0.005  |
| Priorche (%)     | 1 | 68.7 ( 42.0)          | 70.9 ( 43.3)  | 0.027  |
| LN (%)           | 1 | 7.0 ( 4.3)            | 6.7 ( 4.1)    | 0.011  |
| PCI (mean (SD))  |   | 14.47 (11.48)         | 14.59 (11.45) | 0.010  |
| PSS (%)          |   |                       |               | 0.022  |
| 0                |   | 51.7 ( 31.6)          | 50.5 ( 30.9)  |        |
| 1                |   | 48.0 ( 29.3)          | 48.5 ( 29.6)  |        |
| 2                |   | 50.9 ( 31.1)          | 52.1 ( 31.8)  |        |
| 3                |   | 13.0 ( 7.9)           | 12.6 ( 7.7)   |        |
| CC (%)           | 1 | 163.6 (100.0)         | 163.7 (100.0) | <0.001 |
| Epic (%)         | 1 | 37.0 ( 22.6)          | 38.6 ( 23.6)  | 0.023  |
| Histol (%)       | 1 | 58.7 ( 35.9)          | 58.7 ( 35.9)  | <0.001 |

SMD: standard mean difference. We set SMD < 0.3 as perfect balance for the IPTW propensity score matching; Priorche: prior systemic chemotherapy; LN: lymph node; PCI: peritoneal cancer index; PSS: prior surgical score; Epic: early postoperative peritoneal chemotherapy; Histology: 1: low grade; 2: high grade; CC: completeness of cytoreduction score

**eTable 3. Distribution of Prognostic Factors Between the Study Groups Before and After IPTW Weighting Adjustment in CC-2/3 Cases**

| Unweighted comparison |               |               |       |
|-----------------------|---------------|---------------|-------|
|                       | CRS alone     | CRS/HIPEC     | SMD   |
| n                     | 212           | 196           |       |
| Age (mean (SD))       | 61.66 (13.95) | 56.12 (13.81) | 0.399 |
| Priorche = 1 (%)      | 129 (60.8)    | 106 (54.1)    | 0.137 |
| LN = 1 (%)            | 7 ( 3.3)      | 25 (12.8)     | 0.353 |
| PCI (mean (SD))       | 30.08 (8.91)  | 30.32 (7.80)  | 0.028 |
| PSS (%)               |               |               | 0.373 |
| 0                     | 66 (31.1)     | 68 (34.7)     |       |
| 1                     | 51 (24.1)     | 54 (27.6)     |       |
| 2                     | 78 (36.8)     | 43 (21.9)     |       |
| 3                     | 17 ( 8.0)     | 31 (15.8)     |       |
| CC = 3 (%)            | 175 (82.5)    | 117 (59.7)    | 0.521 |
| Epic = 1 (%)          | 16 ( 7.5)     | 25 (12.8)     | 0.173 |
| Histol = 2 (%)        | 120 (56.6)    | 104 (53.1)    | 0.071 |

| Weighted comparison |               |               |       |
|---------------------|---------------|---------------|-------|
|                     | CRS alone     | CRS/HIPEC     | SMD   |
| n                   | 146.57        | 144.60        |       |
| Age (mean (SD))     | 58.48 (13.62) | 58.72 (13.39) | 0.018 |
| Priorche = 1 (%)    | 84.9 (57.9)   | 84.9 (58.7)   | 0.017 |
| LN = 1 (%)          | 6.8 ( 4.6)    | 6.3 ( 4.4)    | 0.012 |
| PCI (mean (SD))     | 30.72 (7.95)  | 30.75 (7.89)  | 0.004 |
| PSS (%)             |               |               | 0.036 |
| 0                   | 48.3 (33.0)   | 48.8 (33.7)   |       |
| 1                   | 40.9 (27.9)   | 41.7 (28.8)   |       |
| 2                   | 41.7 (28.5)   | 39.0 (27.0)   |       |
| 3                   | 15.6 (10.6)   | 15.2 (10.5)   |       |
| CC = 3 (%)          | 122.2 (83.3)  | 94.9 (65.6)   | 0.416 |
| Epic = 1 (%)        | 13.8 ( 9.4)   | 14.3 ( 9.9)   | 0.017 |
| Histol = 2 (%)      | 79.1 (54.0)   | 79.3 (54.9)   | 0.018 |

SMD: standard mean difference. We set SMD < 0.3 as perfect balance for the IPTW propensity score matching; Priorche: prior systemic chemotherapy; LN: lymph node; PCI: peritoneal cancer index; PSS: prior surgical score; Epic: early postoperative peritoneal chemotherapy; Histology: 1: low grade; 2: high grade; CC: completeness of cytoreduction score

**eTable 4. Distribution of Prognostic Factors Between the Study Groups Before and After IPTW Weighting Adjustment in Low-Grade Disease**

| Unweighted comparison |               |               |       |
|-----------------------|---------------|---------------|-------|
|                       | CRS alone     | CRS/HIPEC     | SMD   |
| n                     | 197           | 1056          |       |
| Age (mean (SD))       | 59.42 (14.87) | 54.35 (12.40) | 0.371 |
| Priorche = 1 (%)      | 78 (39.6)     | 279 (26.4)    | 0.283 |
| LN = 1 (%)            | 2 (1.0)       | 25 (2.4)      | 0.105 |
| PCI (mean (SD))       | 21.48 (13.30) | 18.39 (10.74) | 0.255 |
| CC (%)                |               |               | 0.964 |
| 1                     | 105 (53.3)    | 964 (91.3)    |       |
| 2                     | 16 (8.1)      | 41 (3.9)      |       |
| 3                     | 76 (38.6)     | 51 (4.8)      |       |
| PSS (%)               |               |               | 0.282 |
| 0                     | 56 (28.4)     | 225 (21.3)    |       |
| 1                     | 53 (26.9)     | 353 (33.4)    |       |
| 2                     | 66 (33.5)     | 289 (27.4)    |       |
| 3                     | 22 (11.2)     | 189 (17.9)    |       |
| Epic = 1 (%)          | 24 (12.2)     | 141 (13.4)    | 0.035 |
| Weighted comparison   |               |               |       |
|                       | CRS alone     | CRS/HIPEC     | SMD   |
| n                     | 167.63        | 164.68        |       |
| Age (mean (SD))       | 57.55 (14.65) | 57.39 (14.48) | 0.011 |
| Priorche = 1 (%)      | 62.1 (37.0)   | 62.8 (38.1)   | 0.023 |
| LN = 1 (%)            | 1.7 (1.0)     | 1.6 (1.0)     | 0.005 |
| PCI (mean (SD))       | 19.54 (12.87) | 19.52 (12.59) | 0.002 |
| CC (%)                |               |               | 0.051 |
| 1                     | 105.0 (62.6)  | 105.2 (63.9)  |       |
| 2                     | 15.9 (9.5)    | 13.3 (8.1)    |       |
| 3                     | 46.7 (27.9)   | 46.1 (28.0)   |       |
| PSS (%)               |               |               | 0.049 |
| 0                     | 43.2 (25.8)   | 45.4 (27.6)   |       |
| 1                     | 48.3 (28.8)   | 47.2 (28.7)   |       |
| 2                     | 56.2 (33.6)   | 52.1 (31.7)   |       |
| 3                     | 19.8 (11.8)   | 19.9 (12.1)   |       |
| Epic = 1 (%)          | 21.1 (12.6)   | 22.4 (13.6)   | 0.031 |

SMD: standard mean difference. We set SMD < 0.3 as perfect balance for the IPTW propensity score matching; Priorche: prior systemic chemotherapy; LN: lymph node; PCI: peritoneal cancer index; PSS: prior surgical score; Epic: early postoperative peritoneal chemotherapy; Histology: CC: completeness of cytoreduction score

**eTable 5. Distribution of Prognostic Factors Between the Study Groups Before and After IPTW Weighting Adjustment in High-Grade Disease**

| Unweighted comparison |               |               |       |
|-----------------------|---------------|---------------|-------|
|                       | CRS alone     | CRS/HIPEC     | SMD   |
| n                     | 179           | 492           |       |
| Age (mean (SD))       | 58.35 (14.07) | 52.58 (12.22) | 0.438 |
| Priorche = 1 (%)      | 120 (67.0)    | 250 (50.8)    | 0.334 |
| LN = 1 (%)            | 12 ( 6.7)     | 94 (19.1)     | 0.376 |
| PCI (mean (SD))       | 25.23 (11.81) | 21.89 (11.61) | 0.285 |
| CC (%)                |               |               | 1.081 |
| 1                     | 59 (33.0)     | 388 (78.9)    |       |
| 2                     | 21 (11.7)     | 38 ( 7.7)     |       |
| 3                     | 99 (55.3)     | 66 (13.4)     |       |
| PSS (%)               |               |               | 0.412 |
| 0                     | 62 (34.6)     | 130 (26.4)    |       |
| 1                     | 46 (25.7)     | 114 (23.2)    |       |
| 2                     | 63 (35.2)     | 167 (33.9)    |       |
| 3                     | 8 ( 4.5)      | 81 (16.5)     |       |
| Epic = 1 (%)          | 29 (16.2)     | 109 (22.2)    | 0.152 |
| Weighted comparison   |               |               |       |
|                       | CRS alone     | CRS/HIPEC     | SMD   |
| n                     | 137.09        | 135.71        |       |
| Age (mean (SD))       | 55.93 (13.46) | 55.87 (13.32) | 0.004 |
| Priorche = 1 (%)      | 87.6 (63.9)   | 85.9 (63.3)   | 0.013 |
| LN = 1 (%)            | 10.6 ( 7.7)   | 10.8 ( 8.0)   | 0.008 |
| PCI (mean (SD))       | 24.69(12.42)  | 24.63 (12.11) | 0.004 |
| CC (%)                |               |               | 0.124 |
| 1                     | 58.9 (43.0)   | 60.8 (44.8)   |       |
| 2                     | 20.2 (14.7)   | 14.4 (10.6)   |       |
| 3                     | 58.0 (42.3)   | 60.5 (44.6)   |       |
| PSS (%)               |               |               | 0.240 |
| 0                     | 42.0 (30.6)   | 45.2 (33.3)   |       |
| 1                     | 35.7 (26.0)   | 39.8 (29.3)   |       |
| 2                     | 52.4 (38.3)   | 38.5 (28.4)   |       |
| 3                     | 7.0 ( 5.1)    | 12.2 ( 9.0)   |       |
| Epic = 1 (%)          | 25.5 (18.6)   | 26.9 (19.8)   | 0.030 |

SMD: standard mean difference. We set SMD < 0.3 as perfect balance for the IPTW propensity score matching; Priorche: prior systemic chemotherapy; LN: lymph node; PCI: peritoneal cancer index; PSS: prior surgical score; Epic: early postoperative peritoneal chemotherapy; Histology: CC: completeness of cytoreduction score



**eTable 6. Distribution of Prognostic Factors Between the Study Groups Before and After IPTW Weighting Adjustment for HIPEC With Cisplatin Plus Mitomycin**

| Unweighted comparison |               |               |       |
|-----------------------|---------------|---------------|-------|
|                       | CRS           | CRS/HIPEC     | SMD   |
| n                     | 376           | 709           |       |
| Age (mean (SD))       | 58.91 (14.48) | 53.96 (12.74) | 0.363 |
| Priorche = 1 (%)      | 198 (52.7)    | 272 (38.4)    | 0.290 |
| LN = 1 (%)            | 14 ( 3.7)     | 29 ( 4.1)     | 0.019 |
| PCI (mean (SD))       | 23.26 (12.74) | 18.48 (11.32) | 0.397 |
| CC (%)                |               |               | 1.032 |
| 1                     | 164 (43.6)    | 616 (86.9)    |       |
| 2                     | 37 ( 9.8)     | 29 ( 4.1)     |       |
| 3                     | 175 (46.5)    | 64 ( 9.0)     |       |
| PSS (%)               |               |               | 0.155 |
| 0                     | 118 (31.4)    | 182 (25.7)    |       |
| 1                     | 99 (26.3)     | 227 (32.0)    |       |
| 2                     | 129 (34.3)    | 250 (35.3)    |       |
| 3                     | 30 ( 8.0)     | 50 ( 7.1)     |       |
| Epic = 1 (%)          | 53 (14.1)     | 80 (11.3)     | 0.085 |
| Histol = 2 (%)        | 179 (47.6)    | 223 (31.5)    | 0.335 |

| Weighted comparison |               |               |       |
|---------------------|---------------|---------------|-------|
|                     | CRS           | CRS/HIPEC     | SMD   |
| n                   | 256.57        | 252.04        |       |
| Age (mean (SD))     | 56.31 (13.92) | 56.28 (13.67) | 0.001 |
| Priorche = 1 (%)    | 124.0 (48.3)  | 124.0 (49.2)  | 0.017 |
| LN = 1 (%)          | 10.8 ( 4.2)   | 11.8 ( 4.7)   | 0.025 |
| PCI (mean (SD))     | 20.07 (12.76) | 19.91 (12.77) | 0.012 |
| CC (%)              |               |               | 0.115 |
| 1                   | 163.4 (63.7)  | 166.4 (66.0)  |       |
| 2                   | 31.1 (12.1)   | 21.8 ( 8.6)   |       |
| 3                   | 62.0 (24.2)   | 63.9 (25.3)   |       |
| PSS (%)             |               |               | 0.018 |
| 0                   | 74.1 (28.9)   | 73.9 (29.3)   |       |
| 1                   | 73.9 (28.8)   | 73.8 (29.3)   |       |
| 2                   | 88.0 (34.3)   | 84.7 (33.6)   |       |
| 3                   | 20.5 ( 8.0)   | 19.7 ( 7.8)   |       |
| Epic = 1 (%)        | 42.4 (16.5)   | 43.7 (17.3)   | 0.022 |
| Histol = 2 (%)      | 108.7 (42.4)  | 108.0 (42.9)  | 0.010 |

SMD: standard mean difference. We set SMD < 0.3 as perfect balance for the IPTW propensity score matching; Priorche: prior systemic chemotherapy; LN: lymph node; PCI: peritoneal cancer index; PSS: prior surgical score; Epic: early postoperative peritoneal chemotherapy; Histology: 1: low grade; 2: high grade; CC: completeness of cytoreduction score

**eTable 7. Distribution of Prognostic Factors Between the Study Groups Before and After IPTW Weighting Adjustment for HIPEC With Mitomycin**

Unweighted comparison

|                  | CRS alone     | CRS/HIPEC     | SMD   |
|------------------|---------------|---------------|-------|
| n                | 376           | 547           |       |
| Age (mean (SD))  | 58.95 (14.49) | 52.82 (12.06) | 0.460 |
| Priorche = 1 (%) | 198 (52.5)    | 147 (26.9)    | 0.543 |
| LN = 1 (%)       | 14 (3.7)      | 71 (13.0)     | 0.340 |
| PCI (mean (SD))  | 23.28 (12.72) | 21.48 (11.22) | 0.150 |
| CC (%)           |               |               | 1.124 |
| 1                | 165 (43.8)    | 476 (87.0)    |       |
| 2                | 37 (9.8)      | 44 (8.0)      |       |
| 3                | 175 (46.4)    | 27 (4.9)      |       |
| PSS (%)          |               |               | 0.545 |
| 0                | 118 (31.3)    | 113 (20.7)    |       |
| 1                | 99 (26.3)     | 151 (27.6)    |       |
| 2                | 130 (34.5)    | 137 (25.0)    |       |
| 3                | 30 (8.0)      | 146 (26.7)    |       |
| Epic = 1 (%)     | 53 (14.1)     | 162 (29.6)    | 0.383 |
| Histol = 2 (%)   | 179 (47.5)    | 187 (34.2)    | 0.273 |

Weighted comparison

|                  | CRS alone     | CRS/HIPEC     | SMD   |
|------------------|---------------|---------------|-------|
| n                | 193.55        | 196.03        |       |
| Age (mean (SD))  | 55.21 (13.66) | 55.47 (13.45) | 0.019 |
| Priorche = 1 (%) | 76.2 (39.4)   | 78.7 (40.1)   | 0.016 |
| LN = 1 (%)       | 10.1 (5.2)    | 10.4 (5.3)    | 0.003 |
| PCI (mean (SD))  | 19.23 (12.74) | 19.22 (11.93) | 0.001 |
| CC (%)           |               | 0.098         |       |
| 1                | 148.0 (76.5)  | 145.8 (74.4)  |       |
| 2                | 19.0 (9.8)    | 25.2 (12.9)   |       |
| 3                | 26.6 (13.7)   | 25.0 (12.8)   |       |
| PSS (%)          |               |               | 0.044 |
| 0                | 52.1 (26.9)   | 50.3 (25.7)   |       |
| 1                | 54.5 (28.1)   | 53.7 (27.4)   |       |
| 2                | 62.4 (32.2)   | 67.0 (34.2)   |       |
| 3                | 24.7 (12.7)   | 25.1 (12.8)   |       |
| Epic = 1 (%)     | 39.7 (20.5)   | 40.1 (20.4)   | 0.002 |
| Histol = 2 (%)   | 70.6 (36.5)   | 71.7 (36.6)   | 0.001 |

SMD: standard mean difference. We set SMD < 0.3 as perfect balance for the IPTW propensity score matching; Priorche: prior systemic chemotherapy; LN: lymph node; PCI: peritoneal cancer index; PSS: prior surgical score; Epic: early postoperative peritoneal chemotherapy; Histology: 1: low grade; 2: high grade; CC: completeness of cytoreduction score

**eTable 8. Distribution of Prognostic Factors Between the Study Groups Before and After IPTW Weighting Adjustment for HIPEC With Oxaliplatin Plus Fluorouracil/Leucovorin**

| Unweighted comparison |               |               |       |
|-----------------------|---------------|---------------|-------|
|                       | CRS alone     | CRS/HIPEC     | SMD   |
| n                     | 376           | 182           |       |
| Age (mean (SD))       | 58.95 (14.49) | 56.57 (11.44) | 0.183 |
| Priorche = 1 (%)      | 198 (52.5)    | 72 (39.6)     | 0.262 |
| LN = 1 (%)            | 14 ( 3.7)     | 14 ( 7.7)     | 0.172 |
| PCI (mean (SD))       | 23.28 (12.72) | 18.27 (10.27) | 0.434 |
| CC (%)                |               |               | 0.996 |
| 1                     | 165 (43.8)    | 157 (86.3)    |       |
| 2                     | 37 ( 9.8)     | 5 ( 2.7)      |       |
| 3                     | 175 (46.4)    | 20 (11.0)     |       |
| PSS (%)               |               |               | 0.446 |
| 0                     | 118 (31.3)    | 39 (21.4)     |       |
| 1                     | 99 (26.3)     | 56 (30.8)     |       |
| 2                     | 130 (34.5)    | 48 (26.4)     |       |
| 3                     | 30 ( 8.0)     | 39 (21.4)     |       |
| Epic = 1 (%)          | 53 (14.1)     | 1 ( 0.5)      | 0.538 |
| Histol = 2 (%)        | 179 (47.5)    | 64 (35.2)     | 0.252 |

| Weighted comparison |               |               |       |
|---------------------|---------------|---------------|-------|
|                     | CRS alone     | CRS/HIPEC     | SMD   |
| n                   | 125.02        | 119.14        |       |
| Age (mean (SD))     | 57.56 (12.65) | 57.18 (12.62) | 0.030 |
| Priorche = 1 (%)    | 56.6 (45.2)   | 52.1 (43.7)   | 0.030 |
| LN = 1 (%)          | 4.0 ( 3.2)    | 3.8 ( 3.2)    | 0.003 |
| PCI (mean (SD))     | 18.54 (11.70) | 18.32 (11.41) | 0.019 |
| CC (%)              |               |               | 0.284 |
| 1                   | 93.5 (74.7)   | 94.6 (79.4)   |       |
| 2                   | 13.9 (11.1)   | 4.5 ( 3.8)    |       |
| 3                   | 17.7 (14.1)   | 20.0 (16.8)   |       |
| PSS (%)             |               |               | 0.045 |
| 0                   | 32.9 (26.3)   | 33.0 (27.7)   |       |
| 1                   | 42.2 (33.8)   | 38.8 (32.6)   |       |
| 2                   | 37.8 (30.2)   | 36.8 (30.9)   |       |
| 3                   | 12.1 ( 9.7)   | 10.5 ( 8.8)   |       |
| Epic = 1 (%)        | 1.2 ( 0.9)    | 1.0 ( 0.8)    | 0.011 |
| Histol = 2 (%)      | 44.4 (35.5)   | 42.6 (35.8)   | 0.005 |

SMD: standard mean difference. We set SMD < 0.3 as perfect balance for the IPTW propensity score matching; Priorche: prior systemic chemotherapy; LN: lymph node; PCI: peritoneal cancer index; PSS: prior surgical score; Epic: early postoperative peritoneal chemotherapy; Histology: 1: low grade; 2: high grade; CC: completeness of cytoreduction score

**eTable 9. Distribution of Prognostic Factors Between the Study Groups Before and After IPTW Weighting Adjustment for HIPEC With Other Oxaliplatin-Based Combinations**

| Unweighted comparison |               |               |       |
|-----------------------|---------------|---------------|-------|
|                       | CRS alone     | CRS/HIPEC     | SMD   |
| n                     | 376           | 88            |       |
| Age (mean (SD))       | 58.95 (14.49) | 53.27 (11.54) | 0.434 |
| Priorche = 1 (%)      | 198 (52.5)    | 28 (31.8)     | 0.429 |
| LN = 1 (%)            | 14 ( 3.7)     | 4 ( 4.5)      | 0.042 |
| PCI (mean (SD))       | 23.28 (12.72) | 18.16 (9.27)  | 0.460 |
| CC (%)                |               |               | 1.359 |
| 1                     | 165 (43.8)    | 84 (95.5)     |       |
| 2                     | 37 ( 9.8)     | 1 ( 1.1)      |       |
| 3                     | 175 (46.4)    | 3 ( 3.4)      |       |
| PSS (%)               |               |               | 0.896 |
| 0                     | 118 (31.3)    | 14 (15.9)     |       |
| 1                     | 99 (26.3)     | 27 (30.7)     |       |
| 2                     | 130 (34.5)    | 13 (14.8)     |       |
| 3                     | 30 ( 8.0)     | 34 (38.6)     |       |
| Epic = 1 (%)          | 53 (14.1)     | 7 ( 8.0)      | 0.196 |
| Histol = 2 (%)        | 179 (47.5)    | 14 (15.9)     | 0.721 |
| Weighted comparison   |               |               |       |
|                       | CRS alone     | CRS/HIPEC     | SMD   |
| n                     | 62.38         | 58.48         |       |
| Age (mean (SD))       | 53.98 (12.05) | 53.68 (12.39) | 0.025 |
| Priorche = 1 (%)      | 21.9 (35.0)   | 20.7 (35.5)   | 0.009 |
| ln = 1 (%)            | 2.2 ( 3.5)    | 2.3 ( 4.0)    | 0.026 |
| PCI (mean (SD))       | 18.26 (11.10) | 18.07 (10.04) | 0.018 |
| CC (%)                |               |               | 0.324 |
| 1                     | 54.3 (87.0)   | 54.5 (93.2)   |       |
| 2                     | 5.5 ( 8.8)    | 1.0 ( 1.7)    |       |
| 3                     | 2.6 ( 4.2)    | 3.0 ( 5.1)    |       |
| PSS (%)               |               |               | 0.039 |
| 0                     | 14.3 (22.9)   | 13.8 (23.6)   |       |
| 1                     | 22.3 (35.8)   | 21.4 (36.6)   |       |
| 2                     | 13.0 (20.8)   | 12.2 (20.8)   |       |
| 3                     | 12.8 (20.5)   | 11.1 (19.0)   |       |
| Epic = 1 (%)          | 7.8 (12.5)    | 6.2 (10.6)    | 0.060 |
| Histol = 2 (%)        | 13.2 (21.2)   | 12.0 (20.5)   | 0.015 |

SMD: standard mean difference. We set SMD < 0.3 as perfect balance for the IPTW propensity score matching; Priorche: prior systemic chemotherapy; LN: lymph node; PCI: peritoneal cancer index; PSS: prior surgical score; Epic: early postoperative peritoneal chemotherapy; Histology: 1: low grade; 2: high grade; CC: completeness of cytoreduction score

**eTable 10. Surgical Outcomes of Patients With PMP Undergoing CRS-HIPEC (n = 1548) and CRS Alone (n = 376)**

(unweighted comparison)

|                                        | <b>CRS HIPEC</b> |  | <b>CRS</b>   |
|----------------------------------------|------------------|--|--------------|
|                                        | <b>n (%)</b>     |  | <b>n (%)</b> |
| <b>90-day mortality</b>                | 48 (3.1%)        |  | 33 (8.8%)    |
| <b>30-day mortality</b>                | 24 (1.6%)        |  | 16 (4.3%)    |
| <b>Return to operating room</b>        | 143 (9.2%)       |  | 35 (9.3%)    |
| <b>Grade 3-5 morbidity</b>             | 506 (32.7%)      |  | 109 (29.0%)  |
| <b>Surgical complications</b>          |                  |  |              |
| Septic collection                      | 125 (8.1%)       |  | 17 (4.5%)    |
| Gastric/bowel fistula                  | 121 (7.8%)       |  | 37 (9.8%)    |
| Pancreatic fistula                     | 32 (2.1%)        |  | 1 (0.3%)     |
| Bleeding                               | 91 (5.9%)        |  | 14 (3.7%)    |
| Genitourinary                          | 10 (0.6%)        |  | 3 (0.8%)     |
| Thromboembolic event                   | 6 (0.4%)         |  | 1 (0.3%)     |
| Isolated cardiac failure               | 58 (3.8%)        |  | 5 (1.3%)     |
| Pneumonia                              | 65 (4.2%)        |  | 12 (3.2%)    |
| Pleural                                | 146 (9.4%)       |  | 12 (3.2%)    |
| Pneumothorax                           | 38 (3.0%)        |  | 0 (0%)       |
| <b>Systemic toxicities</b>             |                  |  |              |
| Bone marrow toxicity                   | 16 (1.0%)        |  | 0 (0%)       |
| Renal Failure                          | 35 (2.3%)        |  | 2 (0.5%)     |
| Disseminated intravascular coagulation | 12 (0.8%)        |  | 2 (0.5%)     |

**eTable 11. Unweighted Comparison of the Distribution of the Prognostic Factors and Outcomes Between Included and Excluded Cases**

| Parameters | Categories             | Included (n=1924)   | Excluded (n=1571)   | SMD              |
|------------|------------------------|---------------------|---------------------|------------------|
| Age        | (median, IQR)          | 56.0 [45.0, 65.0]   | 54.5 [45.0, 62.9]   | 0.089            |
|            | Missing (%)            | 0 (0.0)             | 414 (26.3)          |                  |
| Priorchemo | N (%)                  | 727 (37.8)          | 197 (32.1)          | 0.119            |
|            | Missing                | 0                   | 958                 |                  |
| LN         | positive               | 133 (6.9)           | 55 (3.6)            | 0.148            |
|            | negative               | 1791 (93.1)         | 1469 (96.4)         |                  |
|            | Missing                | 0                   | 47                  |                  |
| PCI        | (mean, IQR)            | 20.0 [10.0, 29.0]   | 19.0 [9.0, 29.0]    | 0.083            |
|            | missing                | 0                   | 987                 |                  |
| CC         | 0/1                    | 1516 (78.8)         | 1259 (80.3)         | 0.038            |
|            | 2/3                    | 408 (21.2)          | 308 (19.7)          |                  |
|            | Missing                | 0                   | 4                   |                  |
| PSS        | 0                      | 473 (24.6)          | 201 (21.0)          | 0.235            |
|            | 1                      | 566 (29.4)          | 211 (22.0)          |                  |
|            | 2                      | 585 (30.4)          | 336 (35.1)          |                  |
|            | 3                      | 300 (15.6)          | 209 (21.8)          |                  |
|            | Missing                | 0                   | 614                 |                  |
| EPIC       | yes                    | 303 (15.7)          | 525 (35.2)          | 0.459            |
|            | no                     | 1621 (84.3)         | 965 (64.8)          |                  |
|            | Missing                | 0                   | 81                  |                  |
| Histology  | Low grade              | 1253 (65.1)         | 1075 (73.7)         | 0.186            |
|            | High grade             | 671 (34.9)          | 384 (26.3)          |                  |
|            | Missing                | 0                   | 112                 |                  |
|            |                        |                     |                     |                  |
| Outcome    |                        |                     |                     |                  |
| Survival   |                        |                     |                     |                  |
|            | - 5 year OS (%; CI95%) | 0.649 (0.621-0.677) | 0.767 (0.741-0.792) | <0.001 (p-value) |
|            | - 10 year OS (%;CI95%) | 0.513 (0.465-0.567) | 0.669 (0.629-0.710) |                  |
|            | missing                | 0                   | 19                  |                  |
|            | 90-day mortality (%)   | 81 (4.2)            | 48 (3.1)            | 0.062            |
|            | missing                | 0                   | 0                   |                  |
|            | 30-day mortality (%)   | 40 (2.1)            | 29 (1.8)            | 0.017            |
|            | missing                | 0                   | 0                   |                  |
|            | Return to OR (%)       | 82 (9.3)            | 82 (5.5)            | 0.145            |
|            | missing                | 0                   | 74                  |                  |
|            | Severe morbidity (%)   | 615 (32.0)          | 283 (18.6)          | 0.311            |
|            | missing                | 0                   | 50                  |                  |

SMD: standardized mean difference

**eTable 12. Unweighted Distribution of Prognostic Factors Between the Study Groups in the Cases That Were Excluded Due to Incomplete Data**

|                        |   | Stratified by hipec  |                      |         |
|------------------------|---|----------------------|----------------------|---------|
|                        |   | CRS alone            | CRS/HIPEC            | SMD     |
| n                      |   | 223                  | 1342                 |         |
| Age (median [IQR])     |   | 58.40 [48.50, 67.00] | 54.00 [44.10, 61.70] | 0.322   |
| Priorche (%)           | 0 | 53 ( 68.8)           | 362 ( 68.3)          | 0.011   |
|                        | 1 | 24 ( 31.2)           | 168 ( 31.7)          |         |
| LN (%)                 | 0 | 215 ( 98.2)          | 1248 ( 96.1)         | 0.126   |
|                        | 1 | 4 ( 1.8)             | 51 ( 3.9)            |         |
| PCI (median [IQR])     |   | 15.00 [7.75, 26.50]  | 19.00 [10.00, 29.00] | 0.146   |
| CC (%)                 | 1 | 223 (100.0)          | 1338 (100.0)         | <0.001  |
| pss (%)                | 0 | 11 ( 23.9)           | 188 ( 20.8)          | 0.311   |
|                        | 1 | 7 ( 15.2)            | 203 ( 22.4)          |         |
|                        | 2 | 13 ( 28.3)           | 321 ( 35.4)          |         |
|                        | 3 | 15 ( 32.6)           | 194 ( 21.4)          |         |
| Epic (%)               | 0 | 161 ( 88.0)          | 801 ( 61.4)          | 0.641   |
|                        | 1 | 22 ( 12.0)           | 503 ( 38.6)          |         |
| Histol (%)             | 1 | 165 ( 77.5)          | 908 ( 73.0)          | 0.102   |
|                        | 2 | 48 ( 22.5)           | 335 ( 27.0)          |         |
| Severe morbidity_(%)   | 0 | 160 ( 83.8)          | 1073 ( 81.0)         | 0.072   |
|                        | 1 | 31 ( 16.2)           | 251 ( 19.0)          |         |
| 10-year OS (% , 95%CI) |   | 30.7% [20.1-46.7%]   | 71.7% [67.5-76.0%]   | p<0.001 |
